# Supplementary material
Source: ML conference proceedings conference paper supplement (https://openaccess.thecvf.com/content/ICCV_2019/html/Romanoni_TAPA-MVS_Textureless-Aware_PAtchMatch_ICCV_2019_paper.html)
Supplement: Supplementary file 1 [file Romanoni_TAPA-MVS_Textureless-Aware_PAtchMatch_ICCV_2019_supplemental.pdf]

# TAPA-MVS: Textureless-Aware PatchMatch Multi-View Stereo supplementary materials

Paper ID 2958

## 1 Introduction

This document presents qualitative comparisons between COLMAP [1] and the proposed method on the Tower of London, NotreDame [2] and ETH3D datasets [3]. In general, the images show that TAPA-MVS is able to significantly improve the completeness. Figure 1 shows the results on the fountain-P11 and HerzJesu-P8 datasets [4].

## References

- [1] Johannes L Schönberger, Enliang Zheng, Jan-Michael Frahm, and Marc Pollefeys. Pixelwise view selection for unstructured multi-view stereo. In *European Conference on Computer Vision*, pages 501–518. Springer, 2016.
- [2] Kyle Wilson and Noah Snavely. Robust global translations with 1dsfm. In *Proceedings of the European Conference on Computer Vision (ECCV)*, 2014.
- [3] Thomas Schops, Johannes L Schonberger, Silvano Galliani, Torsten Sattler, Konrad Schindler, Marc Pollefeys, and Andreas Geiger. A multi-view stereo benchmark with high-resolution images and multi-camera videos. In *Proceedings of the IEEE Conference on Computer Vision and Pattern Recognition*, pages 3260–3269, 2017.
- [4] Christoph Strecha, Wolfgang von Hansen, Luc Van Gool, Pascal Fua, and Ulrich Thoennessen. On benchmarking camera calibration and multi-view stereo for high resolution imagery. In *Computer Vision and Pattern Recognition, 2008. CVPR 2008. IEEE Conference on*, pages 1–8. IEEE, 2008.

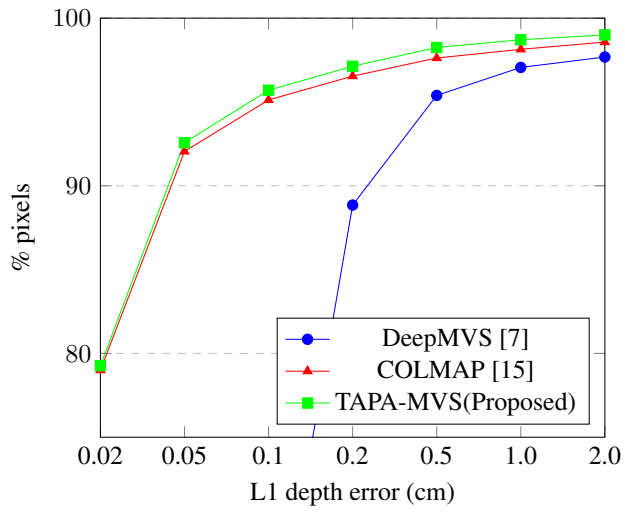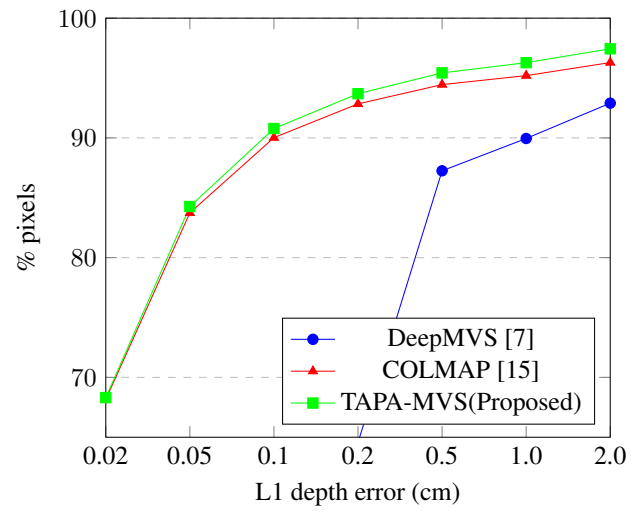

Figure 1: Error distribution in fountain-P11 (left) and HerzJesu-P8 (right) datasets

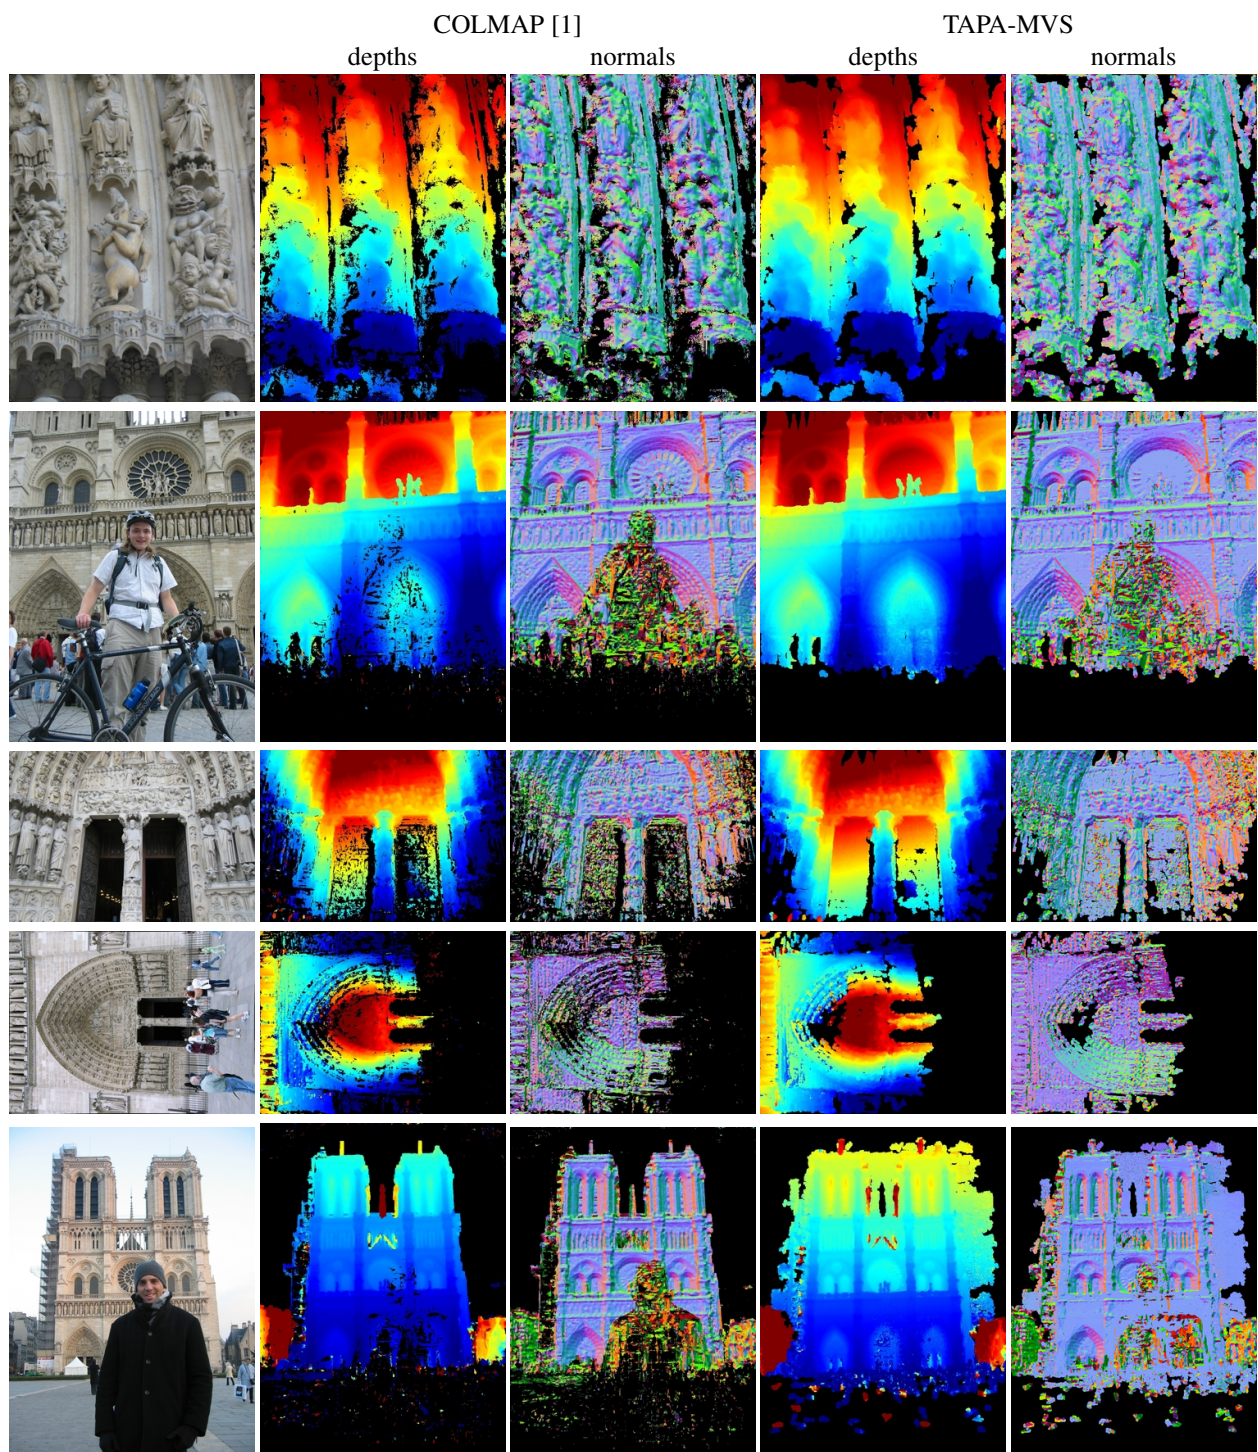

Figure 2: Results on NotreDame dataset [2] (1/2)

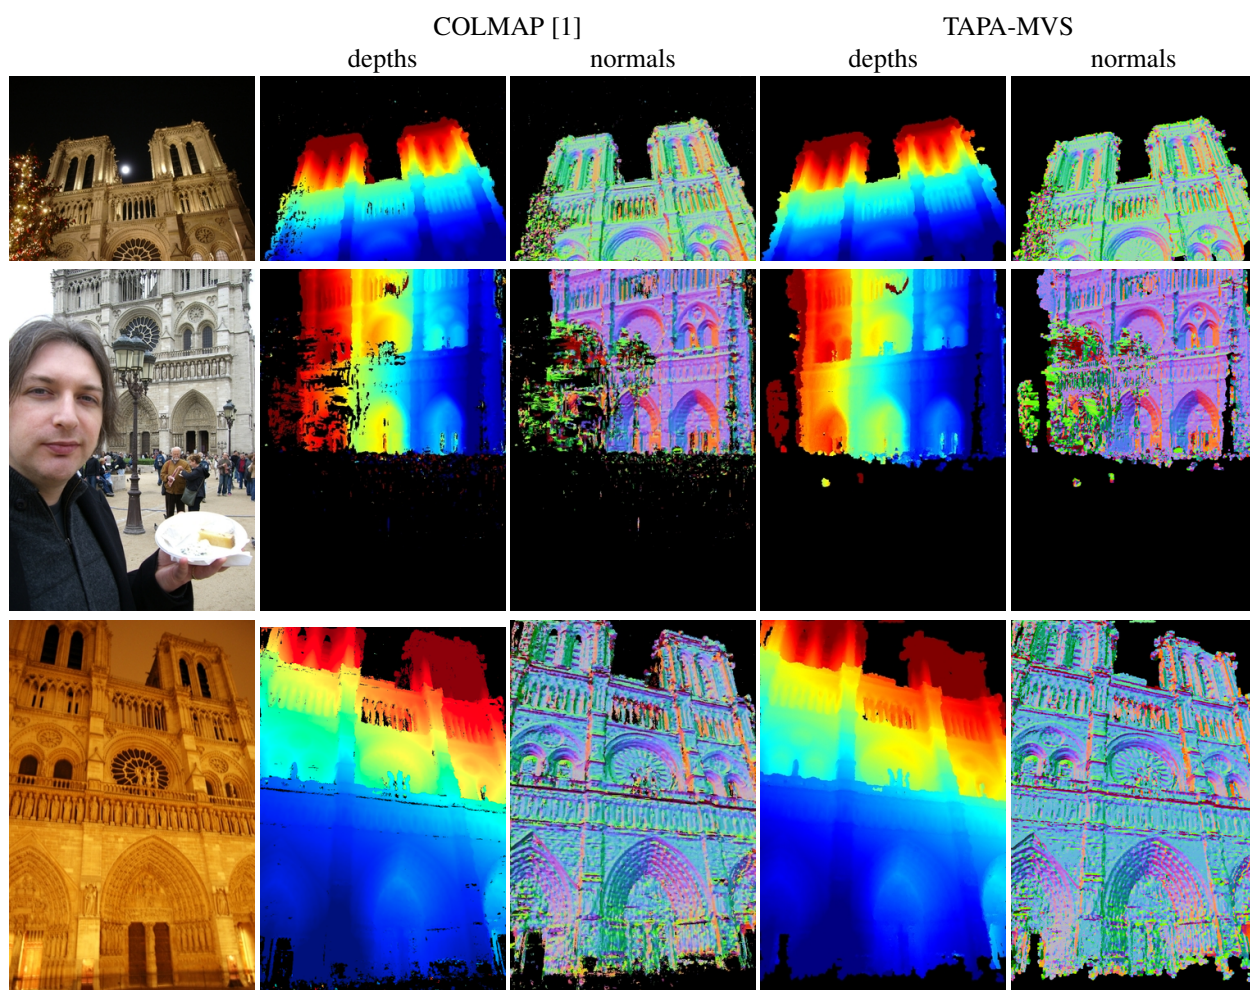

Figure 3: Results on NotreDame dataset [2] (2/2)

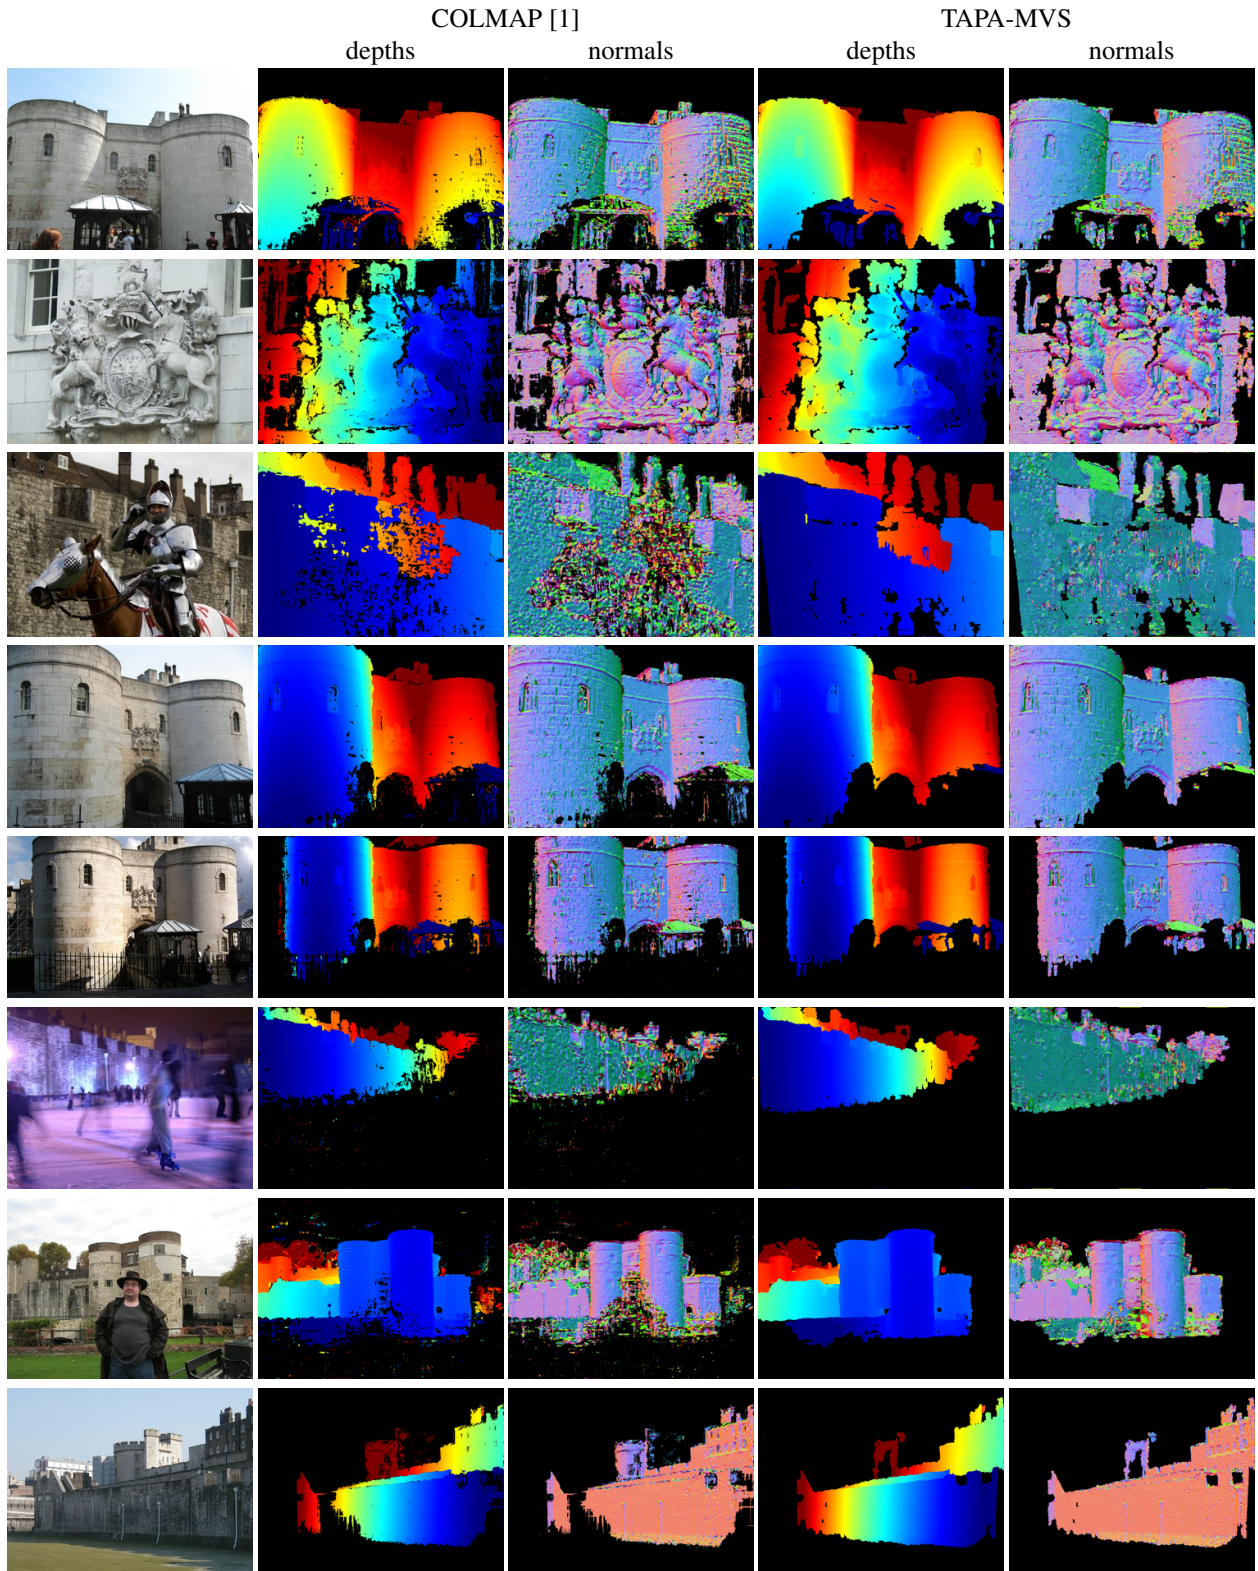

Figure 4: Results on Tower of London Dataset [2] (2/2)

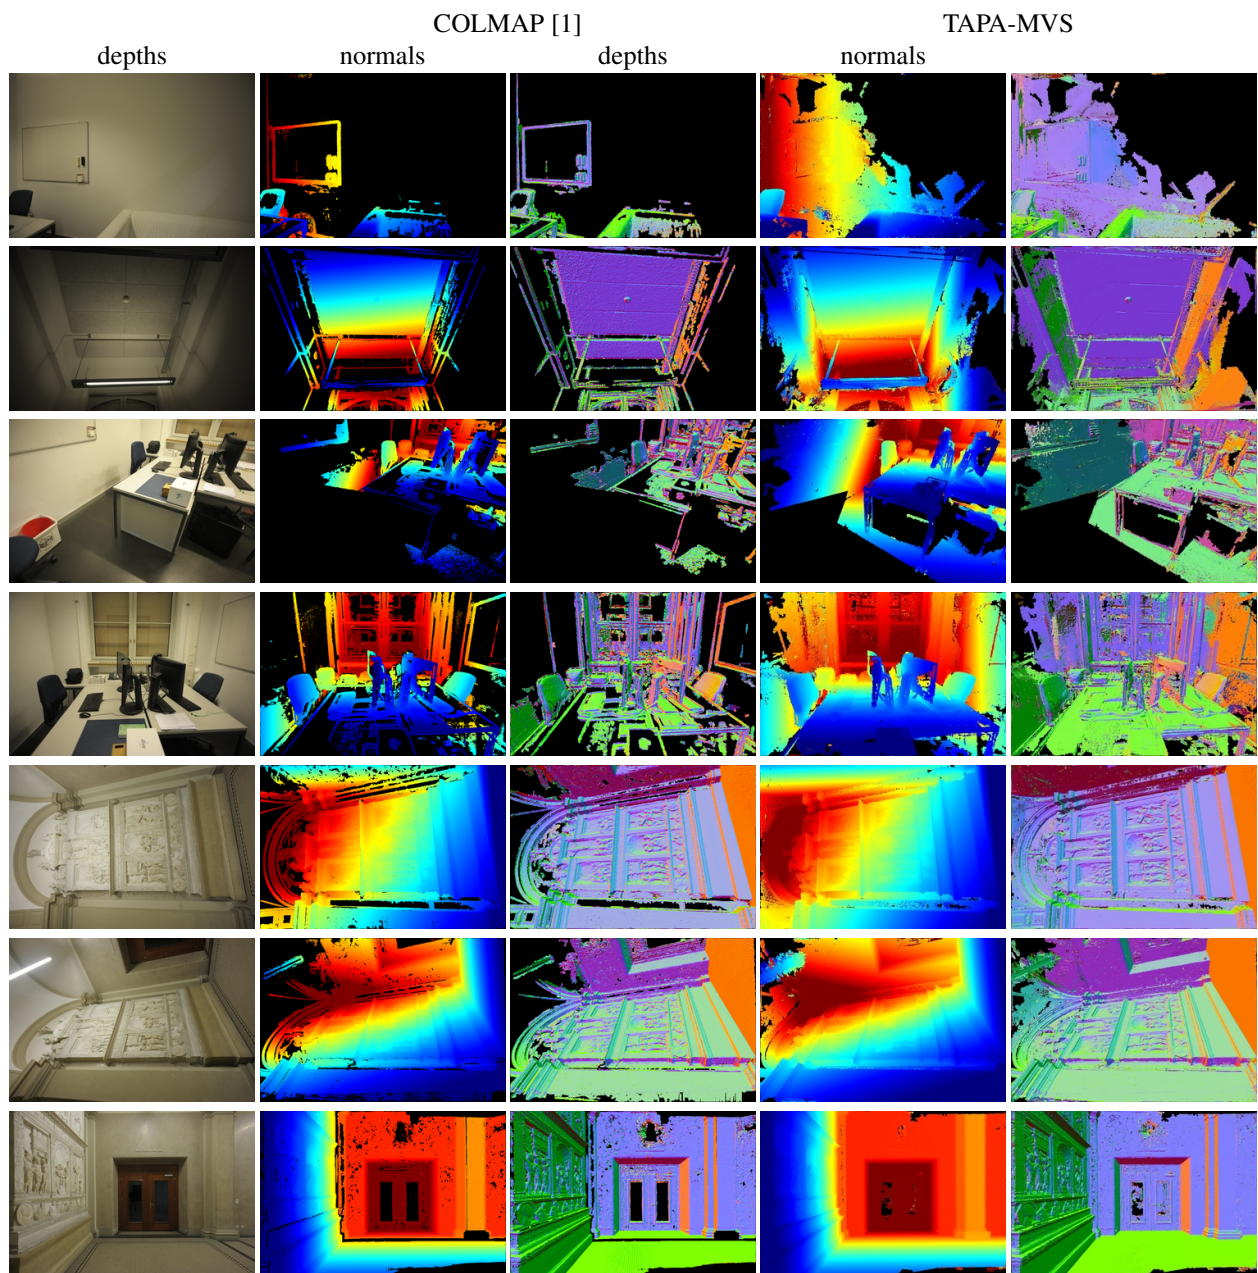

Figure 5: Results on ETH3D dataset (1/5)

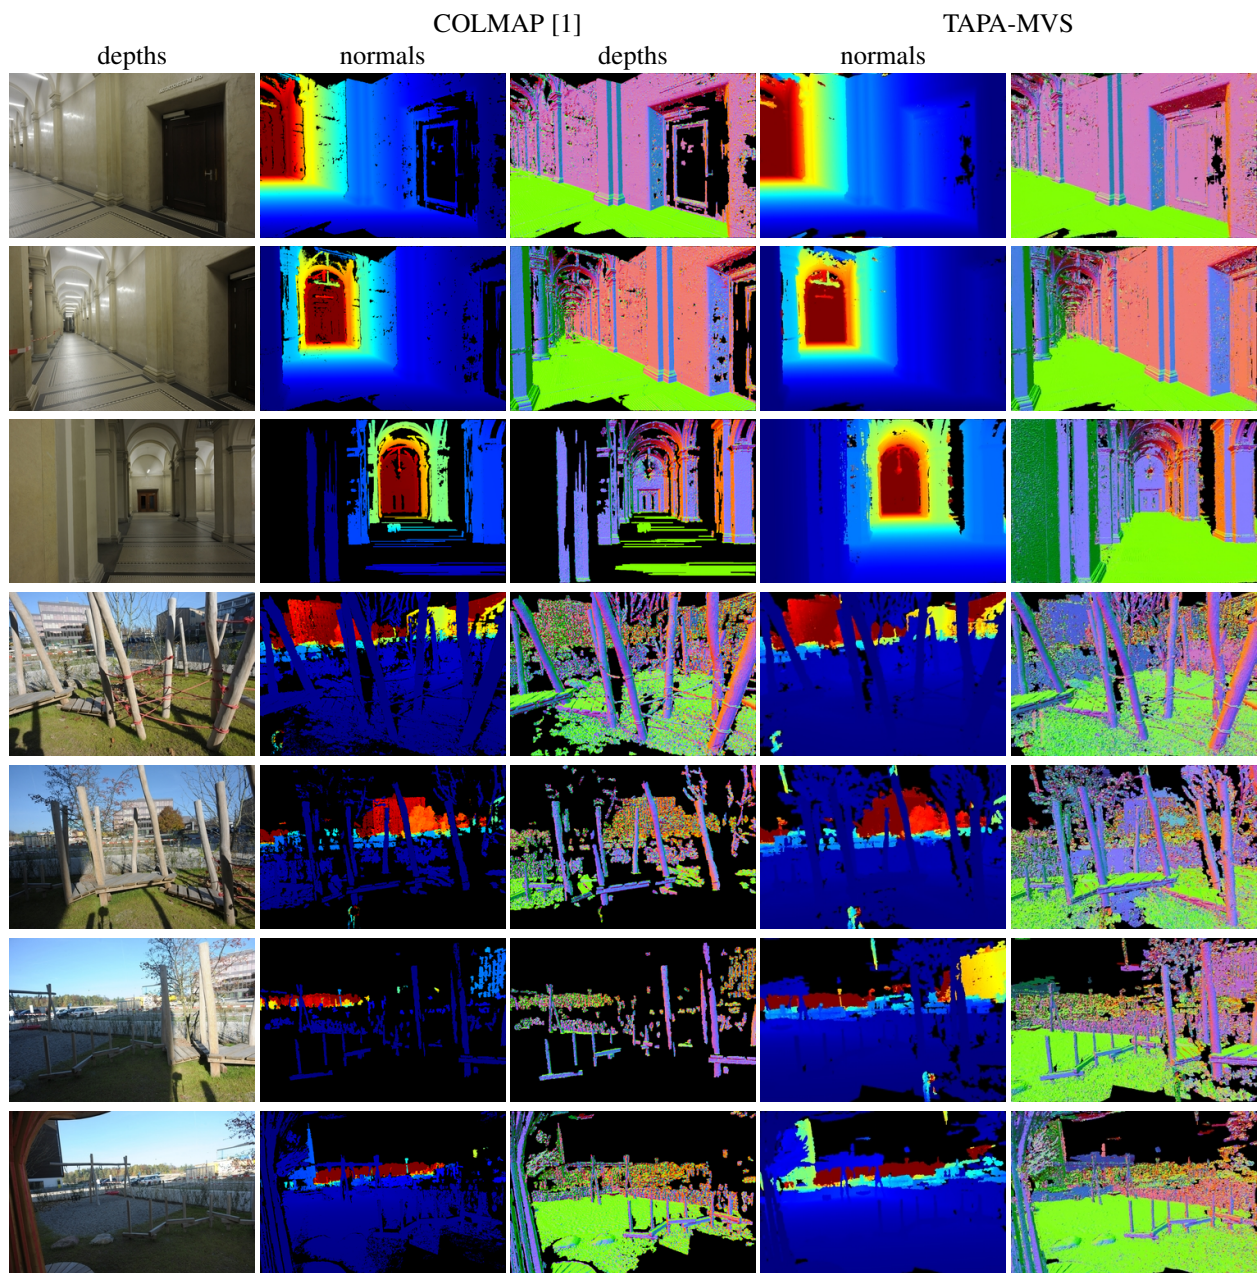

Figure 6: Results on ETH3D dataset (2/5)

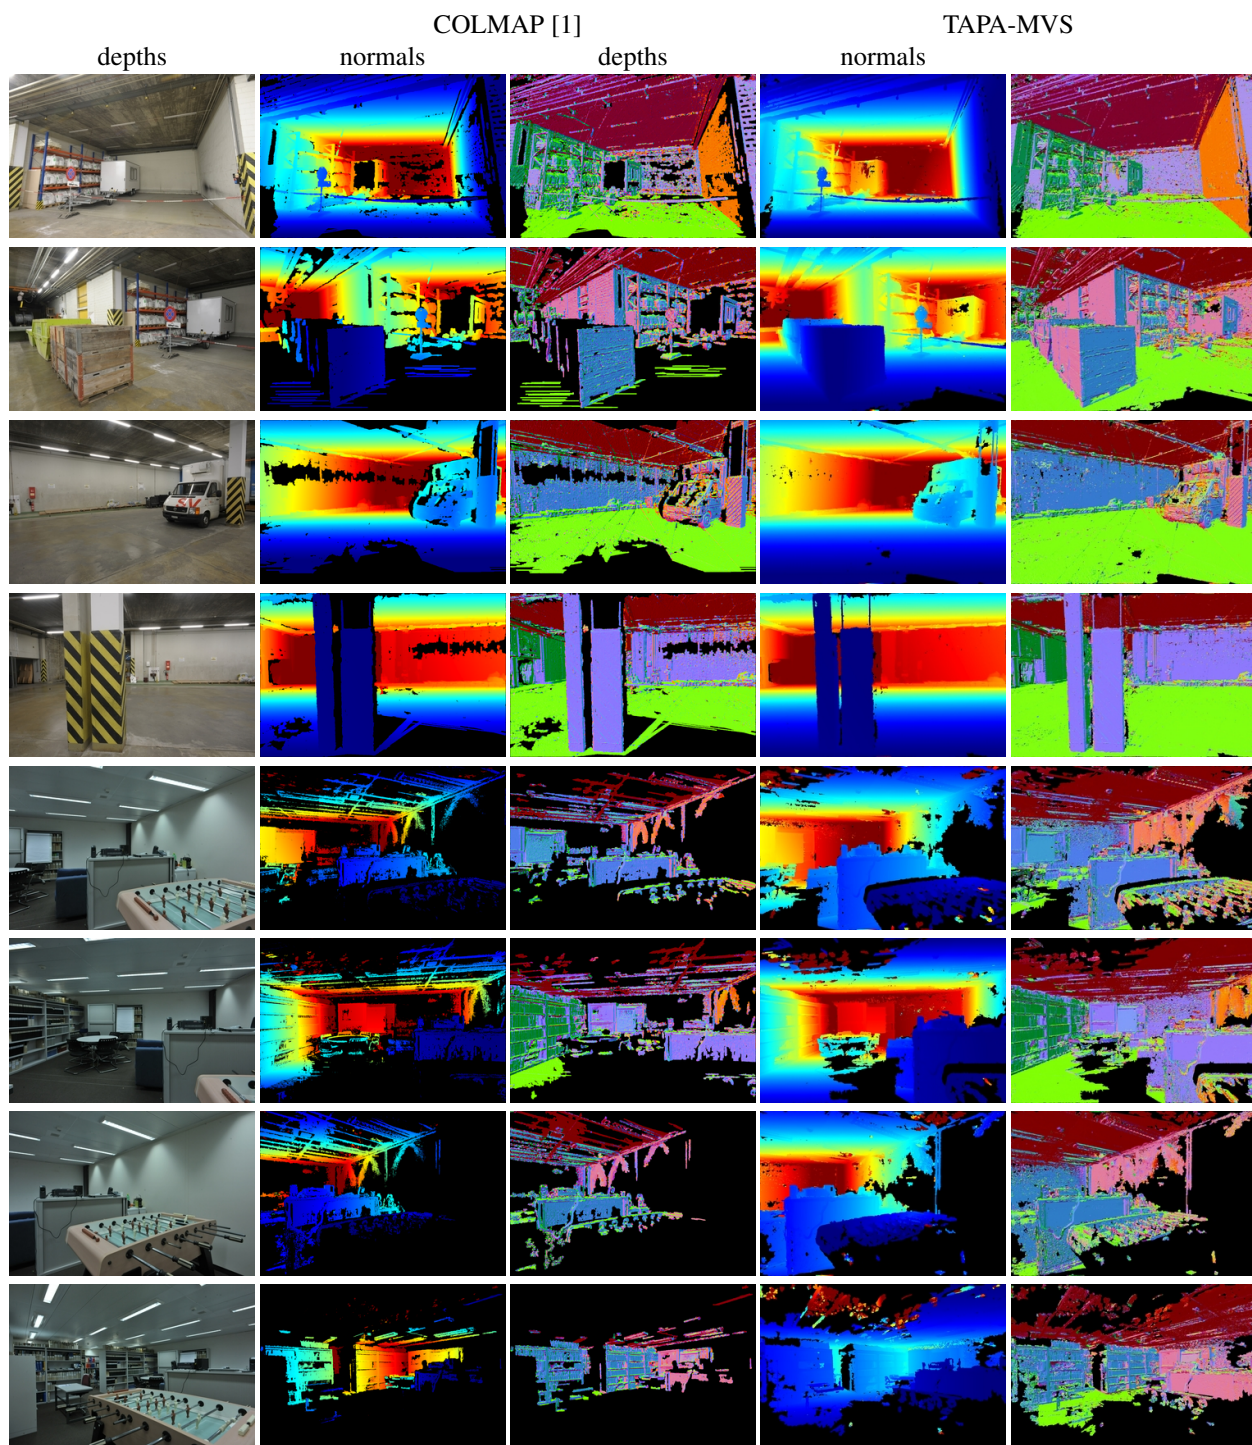

Figure 7: Results on ETH3D dataset (3/5)

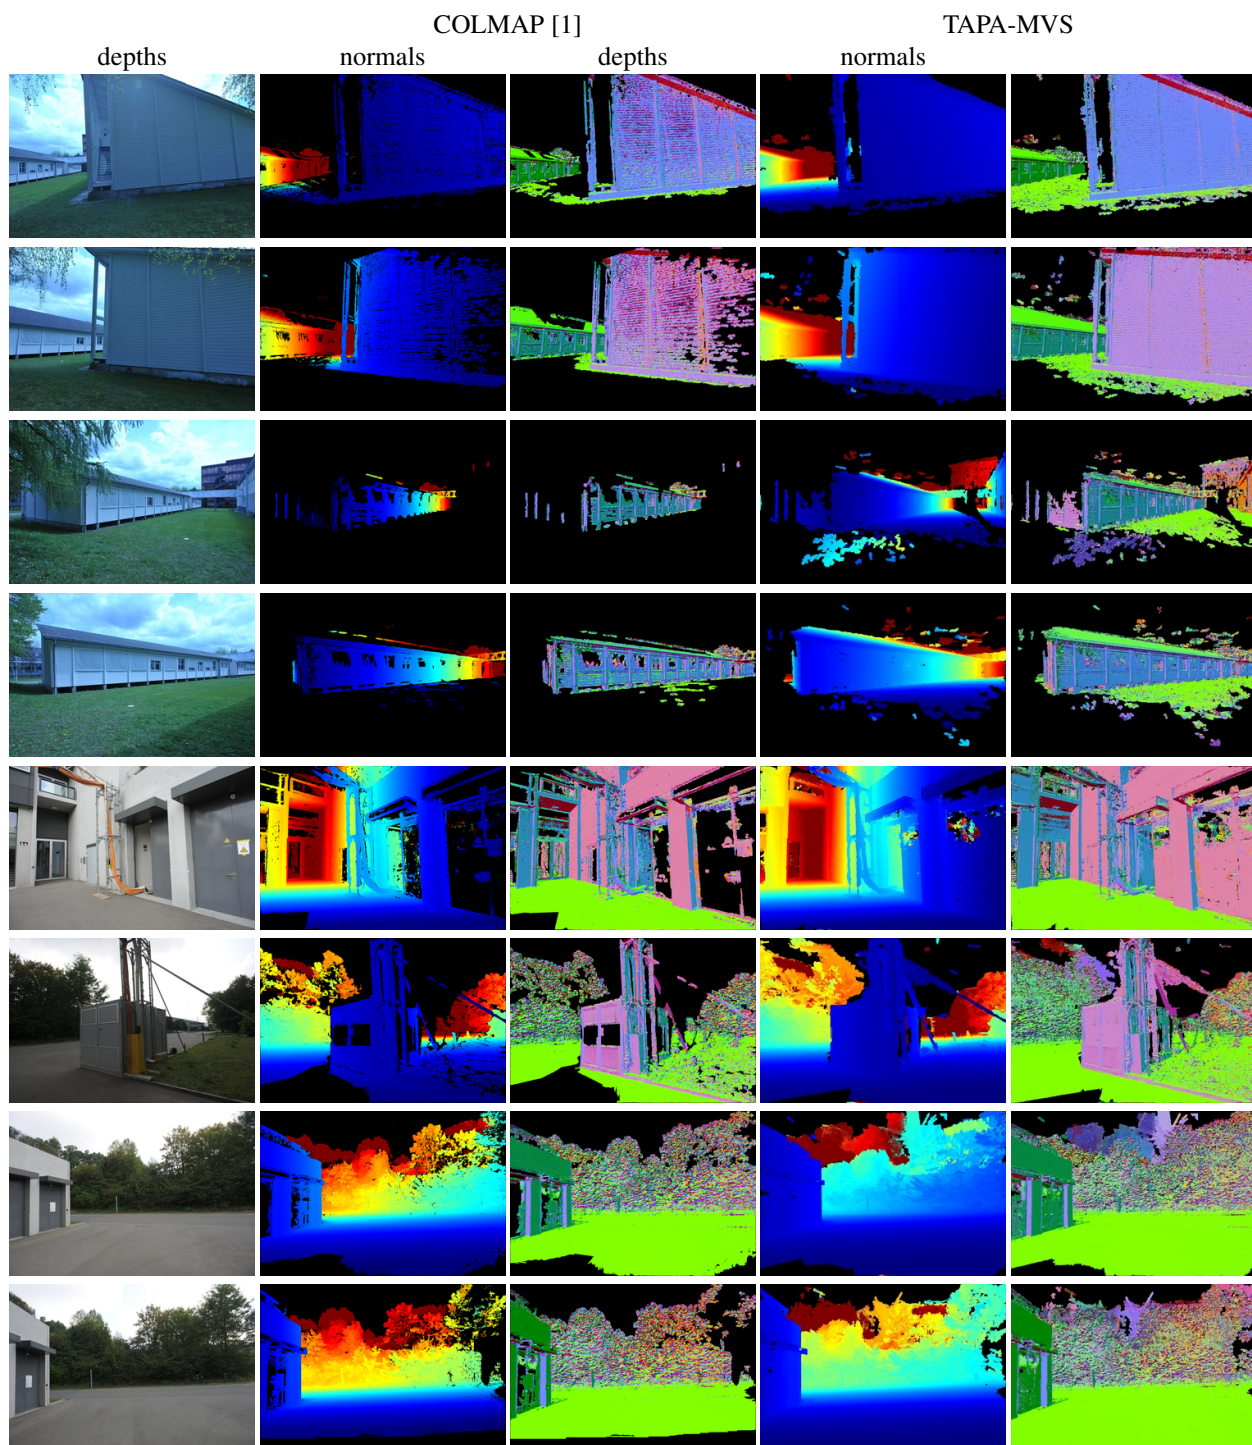

Figure 8: Results on ETH3D dataset (4/5)

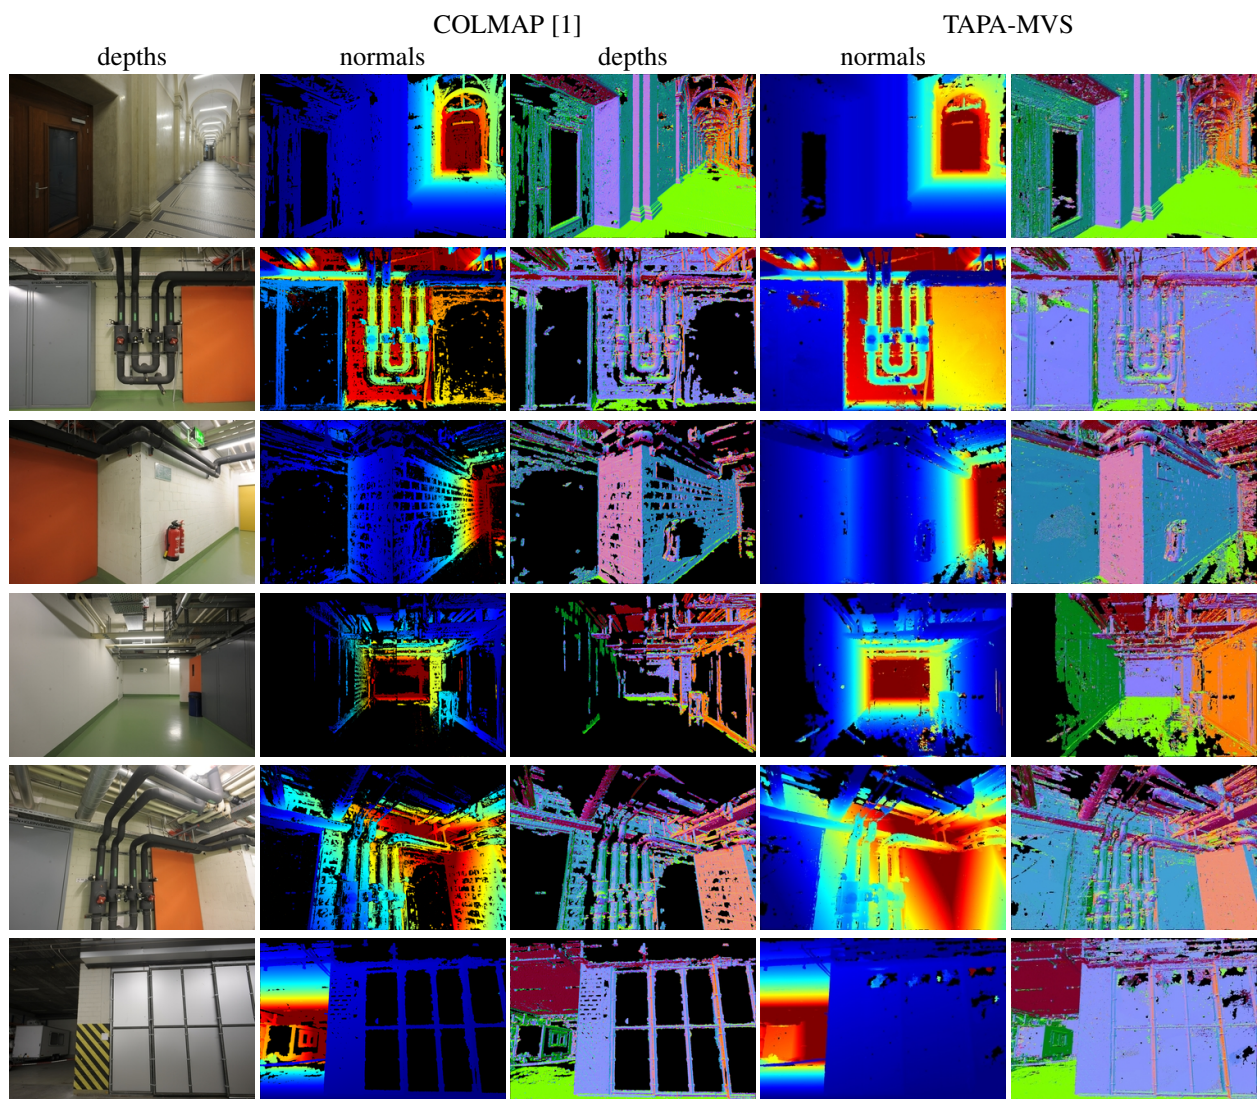

Figure 9: Results on ETH3D dataset (5/5)
